# Supplementary material for: On the consolidation state of sediments from the accretionary prism offshore Vancouver Island, North Cascadia Margin
Source: Springer Nature journal article supplement (doi:10.1007/s11001-022-09487-9), 2022-06-01
Supplement: MOESM3 [file 11001_2022_9487_MOESM3_ESM.docx]

On the consolidation state of sediments from the accretionary prism offshore Vancouver Island, North Cascadia Margin

Journal: Marine Geophysical Research

Michael Riedel1*, Awais Saeed2, Morelia Urlaub1, Achim Kopf2

1 GEOMAR Helmholtz Centre for Ocean Research Kiel, Wischhofstr. 1 – 3,

D-24148 Kiel, Germany

## 2 MARUM Cen­ter for Mar­ine En­vir­on­mental Sci­ences, Leo­bener Str. 8 D-28359 Bre­men, Ger­many

*Corresponding author: mriedel@geomar.de


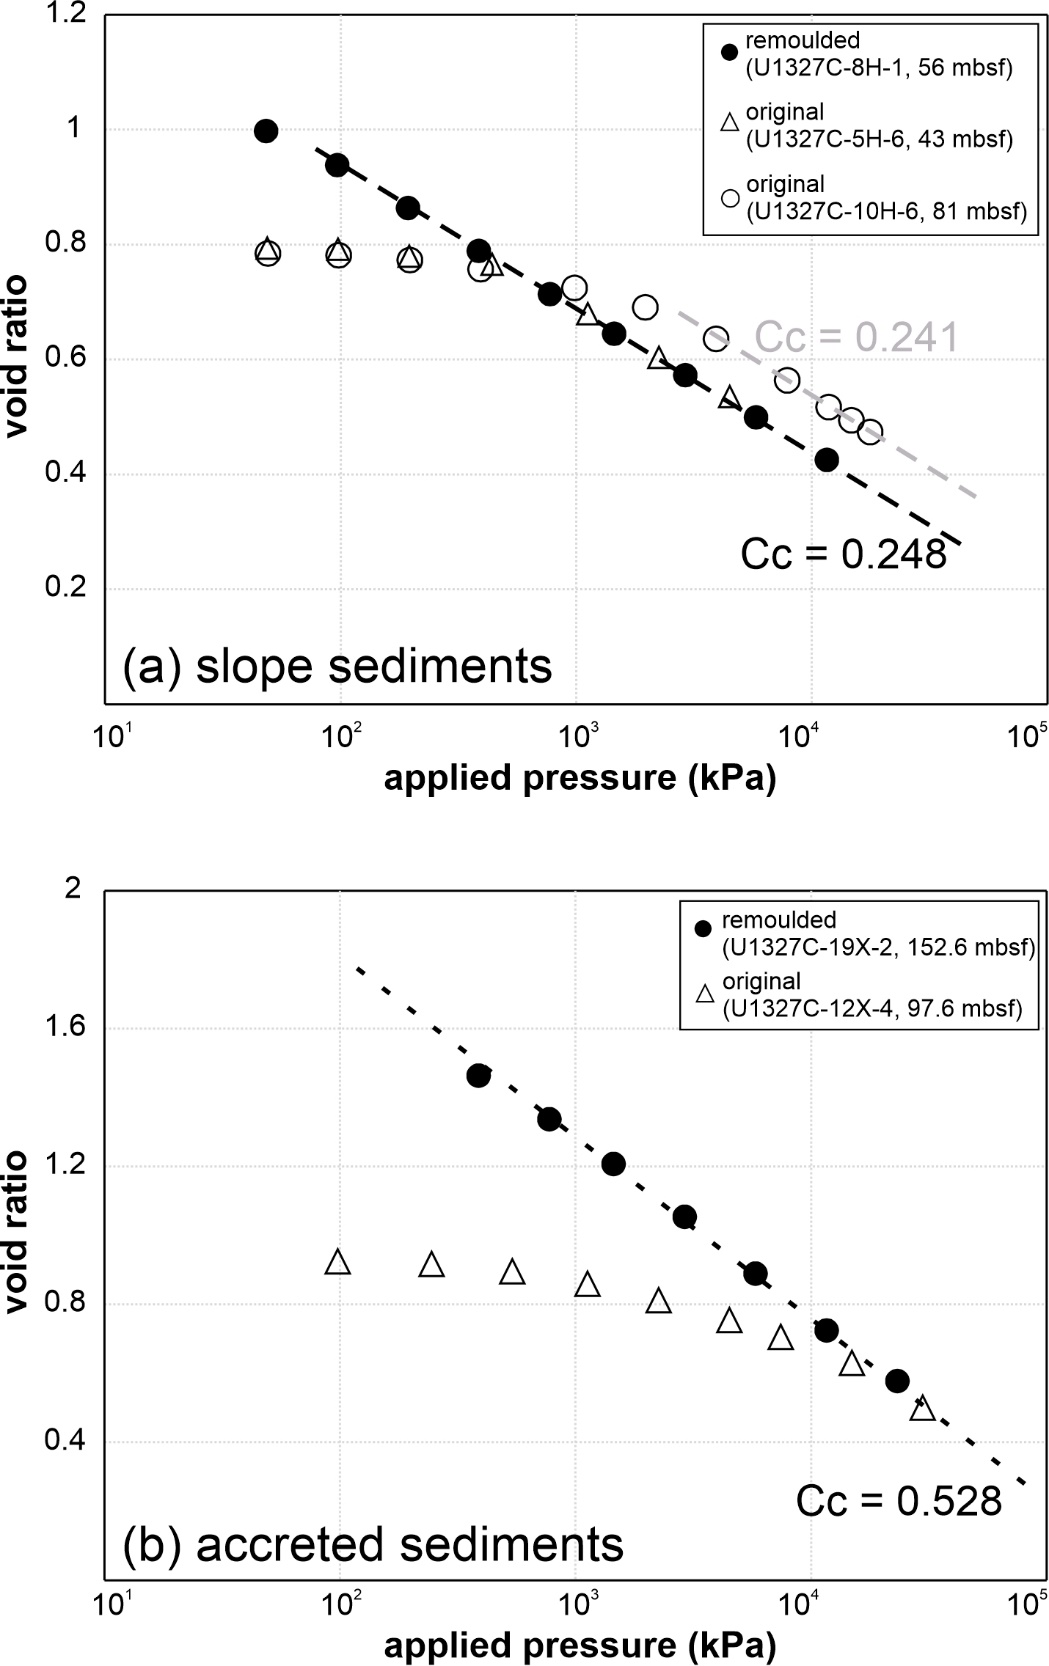


Figure A3 Comparison of oedometer test results of remoulded (solid circles) and original samples (open triangles) for (a) samples typical for slope-sediments and (b) samples typical for accreted sediments.
